# Supplementary material for: Design and evaluation of novel Zn doped mesoporous TiO2 based anode material for advanced lithium ion batteries
Source: Royal Society of Chemistry journal article supplement (doi:10.1039/c2jm33315e), 2012-01-01
Supplement: c2jm33315e.pdf [file c2jm33315e.pdf]

# Supporting Information

## Design and Evaluation of Novel Zn Doped Mesoporous TiO<sub>2</sub> Based Anode

### Material for Advanced Lithium Ion Batteries

Zahid Ali,<sup>a</sup> Seung Nam Cha,<sup>b</sup> Jung Inn Sohn,<sup>b</sup> Imran Shakir,<sup>a</sup> Chanzeng Yan,<sup>a</sup> Jong Min Kim<sup>b</sup>  
and Dae Joon Kang<sup>\*a</sup>

<sup>a</sup>BK 21 Physics Research Division, Department of Energy Science, Institute of Basic Sciences, SKKU Advanced Institute of Nanotechnology, Sungkyunkwan University, Suwon 440-746, Korea.

<sup>b</sup>Frontier Research Lab, Samsung Advanced Institute of Technology, Yongin, Republic of Korea

\*Corresponding Author: [djkang@skku.edu](mailto:djkang@skku.edu)

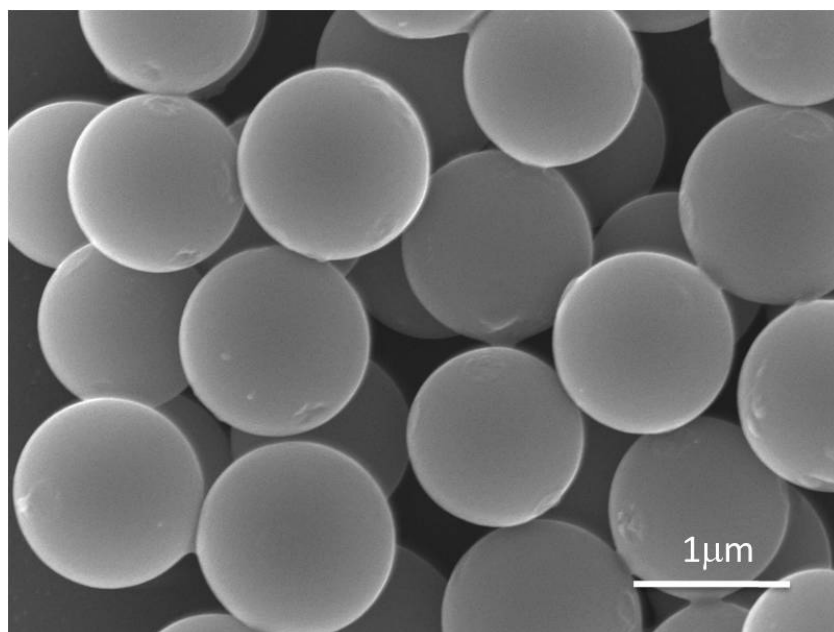

**Fig. S1:** SEM image of as synthesized TiO<sub>2</sub> microspheres.

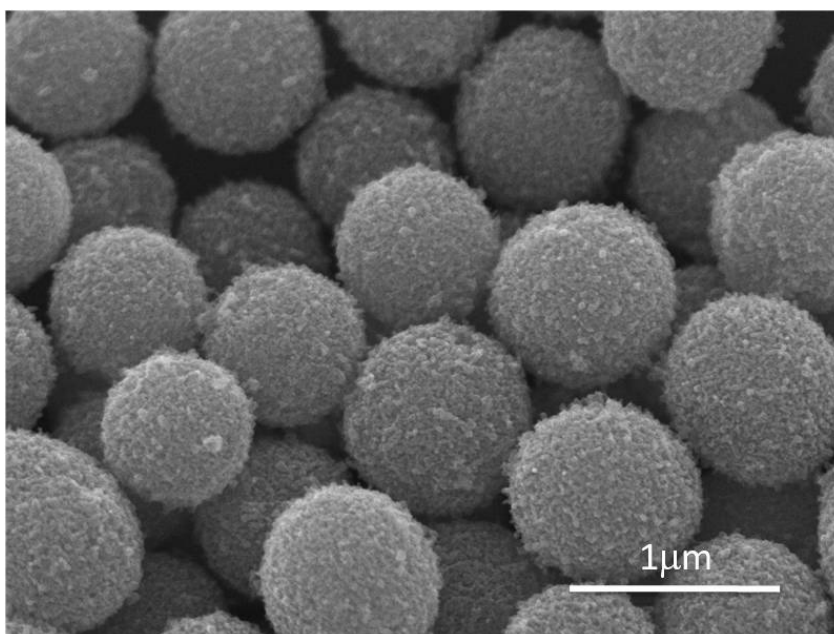

**Fig. S2:** SEM image of mesoporous TiO<sub>2</sub> microspheres calcined at 500 °C.

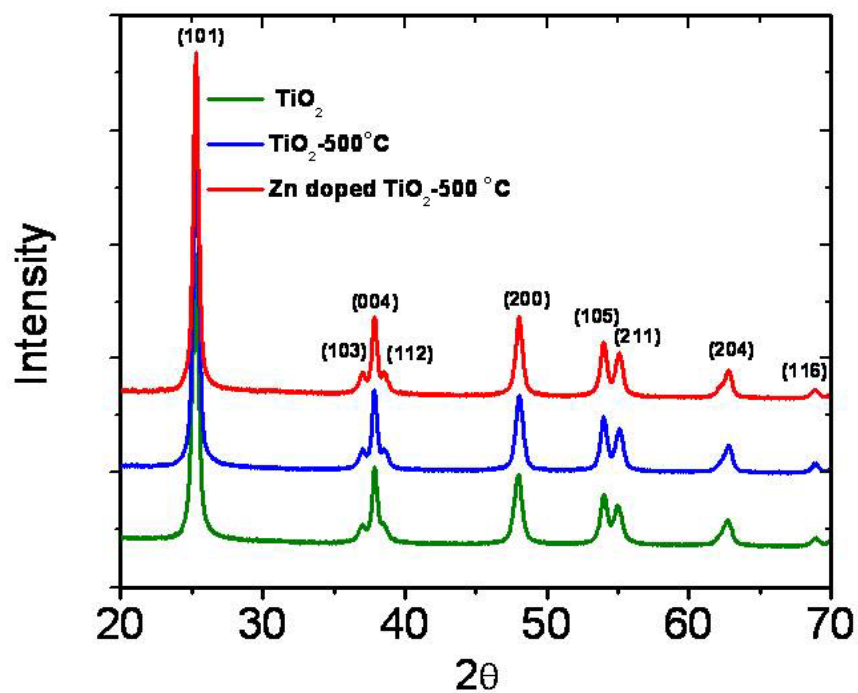

**Fig.S3:** XRD patterns of mesoporous TiO<sub>2</sub> microspheres, mesoporous TiO<sub>2</sub> microspheres calcined at 500 °C and zinc doped mesoporous TiO<sub>2</sub> microspheres calcined at 500 °C.

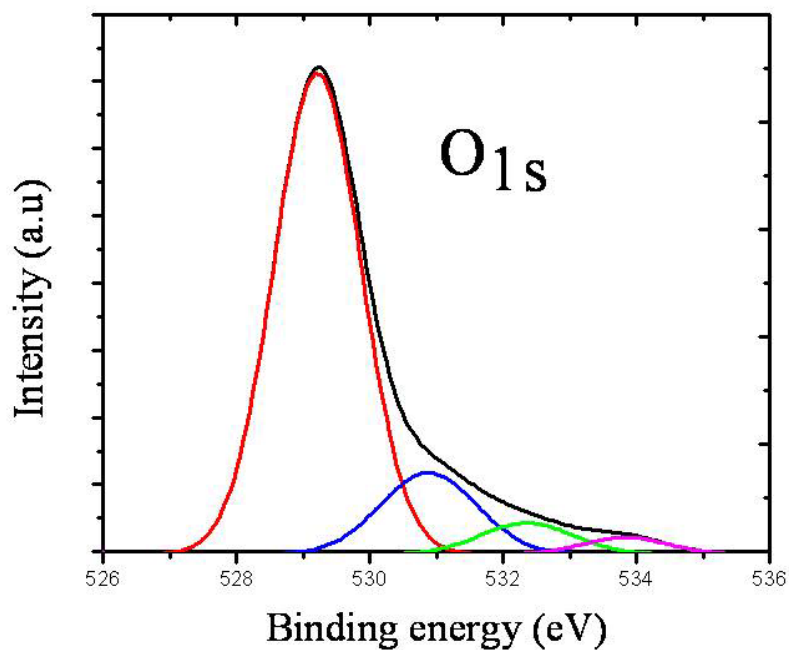

**Fig.S4:** O 1s XPS core level spectra for Zn doped mesoporous TiO<sub>2</sub> microspheres.

**Table 1.** Quantitative ratios of elements determined by XPS and TEM

| <b>Analysis Tool</b> | <b>Atomic %age of Titanium</b> | <b>Atomic %age of Zinc</b> | <b>Atomic %age of Oxygen</b> |
|----------------------|--------------------------------|----------------------------|------------------------------|
| TEM                  | 46.25                          | 1.69                       | 52.06                        |
| XPS                  | 40.28                          | 2.01                       | 57.71                        |
